# Supplementary material for: Xanthurenic acid: a natural ionophore with high selectivity and sensitivity for potassium ions in an aqueous solution
Source: Royal Society of Chemistry journal article supplement (doi:10.1039/c5nj02540k), 2015-12-02
Supplement: c5nj02540k1.pdf [file c5nj02540k1.pdf]

## **Electronic Supplementary Information (ESI)**

# **Xanthurenic acid: A natural ionophore with high selectivity and sensitivity for potassium ions in aqueous solution**

**M. Raju,<sup>a</sup> Tapasya J. Patel,<sup>a</sup> Ratish R. Nair,<sup>a</sup> and  
Pabitra B. Chatterjee\*<sup>a,b</sup>**

<sup>a</sup>Analytical Discipline and Centralized Instrument Facility, CSIR-CSMCRI,  
Bhavnagar, Gujarat, India

<sup>b</sup>Academy of Scientific and Innovative Research, CSIR-CSMCRI,  
Bhavnagar, Gujarat, India.

| <u>Contents</u>                                                                                                                                                                                     | <u>Page No.</u> |
|-----------------------------------------------------------------------------------------------------------------------------------------------------------------------------------------------------|-----------------|
| 1. General procedure of fluorescence experiments                                                                                                                                                    | S3              |
| 2. General procedure of fluorescence titrations                                                                                                                                                     | S3              |
| 3. Determination of LOD from fluorescence titrations                                                                                                                                                | S3              |
| <b>Fig. S1.</b> Absorption and emission spectra of xanthurenic acid (10 $\mu$ M).                                                                                                                   | S5              |
| <b>Fig. S2</b> pH titration profile of <b>H<sub>3</sub>L</b> in absence and presence of $K^+$                                                                                                       | S6              |
| <b>Fig. S3.</b> LOD determination from fluorescence titration data of <b>H<sub>3</sub>L</b> (10 $\mu$ M) in presence of potassium salts.                                                            | S7              |
| <b>Fig. S4.</b> Job's plot of <b>H<sub>3</sub>L</b> with K-salts showing 2:1 stoichiometry monitored at 448 nm (emission) in presence of different concentrations of $K^+$ .                        | S8              |
| <b>Fig. S5.</b> HR-MS spectrum of <b>H<sub>3</sub>L</b> in the negative ion mode showing 2:1 binding stoichiometry of the ionophore with $K^+$ .                                                    | S9              |
| <b>Fig. S6.</b> Fluorescence responses of equimolar (10 $\mu$ M) <b>H<sub>3</sub>L</b> and $K^+$ in the presence of 5-fold (50 equiv in case of $Na^+$ ) of other metal ions in water HEPES buffer. | S10             |
| <b>Table S1.</b> $^1H$ NMR spectral data for <b>H<sub>3</sub>L</b> in $DMSO-d_6$ with the successive addition of $K^+$ . Chemical shifts are against internal TMS.                                  | S11             |

## 1. General procedure of fluorescence experiments

The fluorescence experiments were carried out in aqueous HEPES (50 mM) buffer at pH 7.2. 20  $\mu\text{M}$  metal perchlorate stock solutions of 100 mL were prepared in  $\text{H}_2\text{O}$ . Final test solutions were prepared by taking 1 mL of the above 20  $\mu\text{M}$  metal stock solution and 1 mL of 20  $\mu\text{M}$  **H<sub>3</sub>L** solution to further yield 10  $\mu\text{M}$  each of **H<sub>3</sub>L** and metal solutions. The resolution was set at 1 nm. The excitation was given at 360 nm and the emission spectrum was collected at 448 nm.

## 2. General procedure of fluorescence titrations

Stock solutions for fluorescence titrations were prepared in aqueous HEPES (50 mM) buffer at pH 7.2. The stock concentration of **H<sub>3</sub>L** was kept constant at 20  $\mu\text{M}$  and the stock solutions of potassium perchlorate were prepared by increasing its concentrations from 0.01  $\mu\text{M}$  to 200  $\mu\text{M}$  in water. The binding constant for **H<sub>3</sub>L** was determined from the following equation and fitted in Origin Pro 8.1 software:

$$F = F_0 + \frac{F_{\max} - F_0}{2} \left\{ \left( 1 + \frac{[M]}{C_L} + \frac{1}{C_{LK}} \right) - \sqrt{\left( 1 + \frac{[M]}{C_L} + \frac{1}{C_{LK}} \right)^2 - 4 * \frac{[M]}{C_L}} \right\},$$

where  $F_0$  is the emission intensity of **H<sub>3</sub>L** in absence of potassium salt,  $F$  is the emission intensity of **H<sub>3</sub>L** in presence of different concentrations of potassium salts and  $F_{\max}$  is the emission intensity of **H<sub>3</sub>L** when the complete saturation is reached. All experiments were performed in triplicate. The data shown in **Fig. 3b** is the average of three values.

## 3. Determination of LOD from fluorescence titrations

The detection limit of **H<sub>3</sub>L** for  $\text{K}^+$  was determined from the following equation:

The LOD is  $(3\sigma/S)$  ( $R^2 = 0.998$ , **Fig. S3**). Here  $\sigma$  is the standard deviation and  $S$  is the slope of the calibration curve. Plotting fluorescence against  $[\text{K}^+]$  generates **Fig. S3**. From the **Fig. S3** we calculated slope =  $1.3 \times 10^8$  and the standard deviation was found to be 2.296. Therefore, the LOD value was measured to be 0.53 nM of  $\text{K}^+$ .

$$LOD = \frac{3\sigma}{S} = 3 \frac{\sqrt{\frac{\sum(F - Fi)^2}{n-1}}}{S}$$

In this case,  $n = 10$ ,  $F$  is the fluorescence of **H<sub>3</sub>L**.

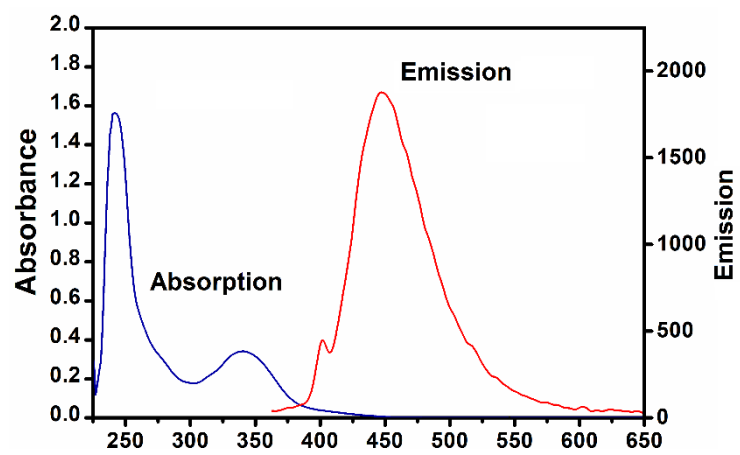

**Fig. S1.** Absorption and emission spectra of xanthurenic acid (10  $\mu$ M) in aqueous HEPES buffer.

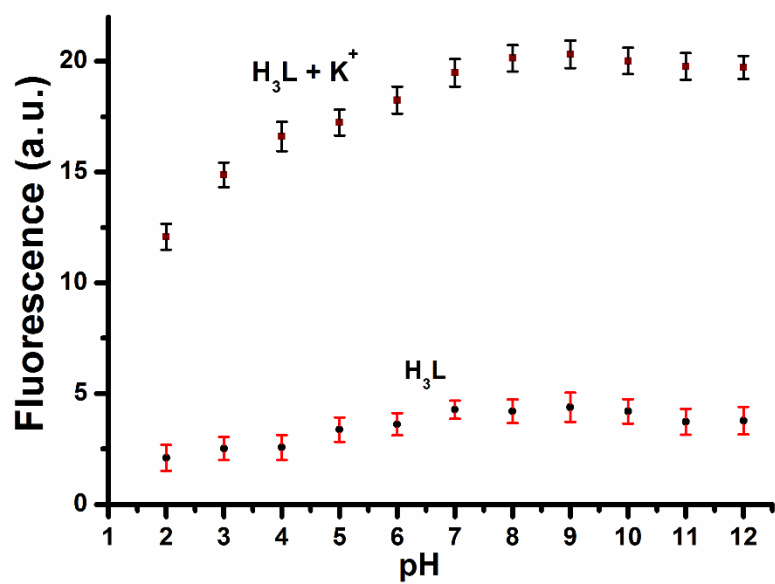

**Fig. S2.** pH titration profile of **H<sub>3</sub>L** in absence and presence of **K<sup>+</sup>**. The data points represent the average of three values and the error bars indicate the standard deviations.

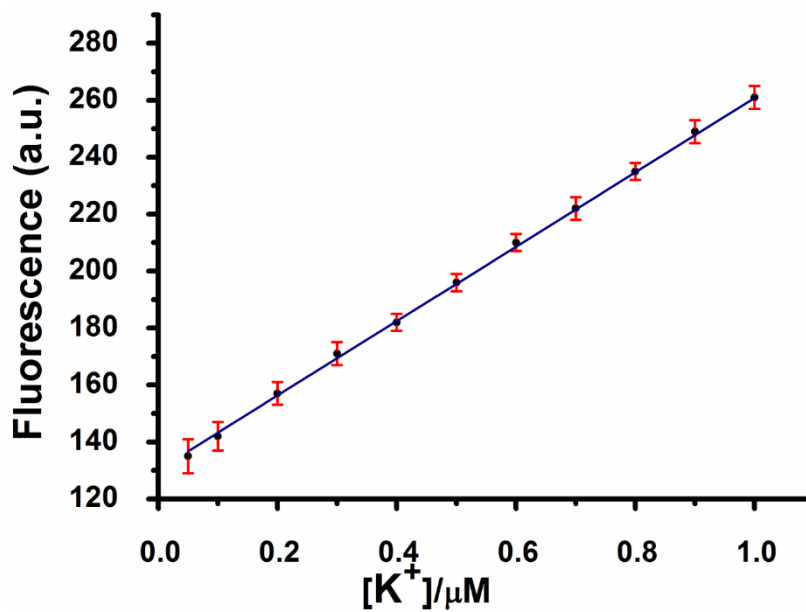

**Fig. S3.** Limit of detection (LOD) determination from fluorescence titration data of **H<sub>3</sub>L** (10 μM) in presence of potassium salts. The data points represent the average of three values and the error bars indicate the standard deviations.

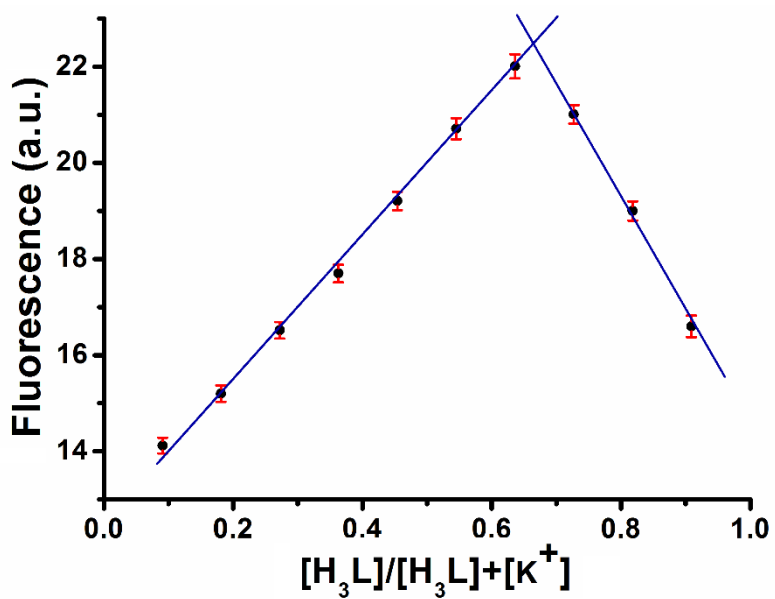

**Fig. S4.** Job's plot of **H<sub>3</sub>L** with K-salt showing 2:1 stoichiometry monitored at 448 nm (emission) in presence of different concentrations of K<sup>+</sup>. The data points represent the average of three values and the error bars indicate the standard deviations.



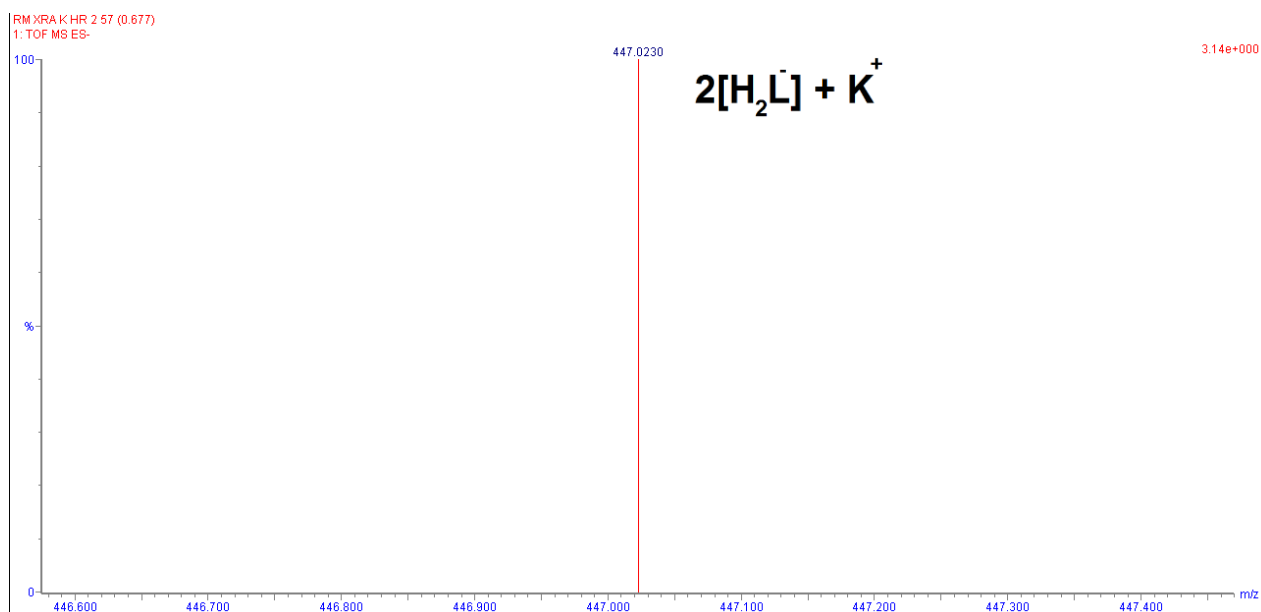

**Fig. S5.** HR-MS spectrum (in the negative ion mode) of  $\text{H}_3\text{L}$  in presence of  $\text{K}^+$  showing 2:1 binding stoichiometry of the ionophore with  $\text{K}^+$ .

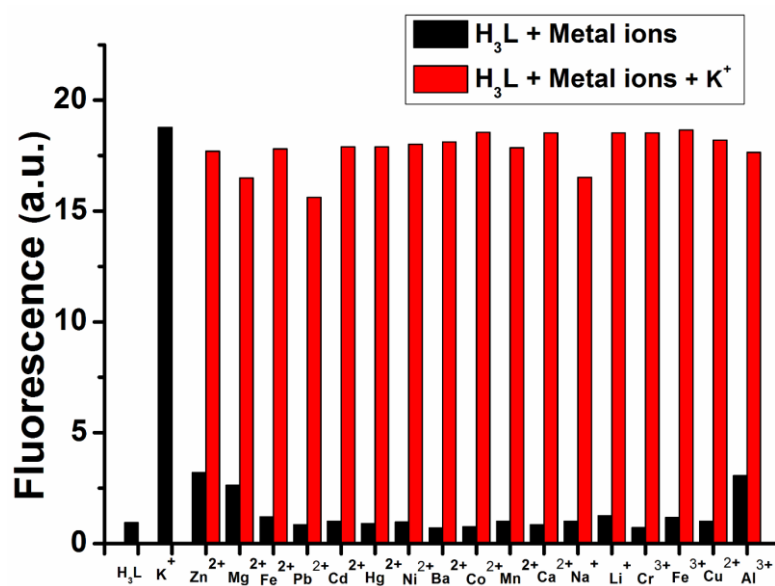

**Fig. S6.** Fluorescence responses of equimolar (10  $\mu\text{M}$ )  $\text{H}_3\text{L}$  and  $\text{K}^+$  in the presence of 5-fold (50 equiv in case of  $\text{Na}^+$ ) of other metal ions in water HEPES buffer.

**Table S1.**  $^1\text{H}$  NMR spectral data for **H<sub>3</sub>L** in  $\text{DMSO-}d_6$  with the successive addition of  $\text{K}^+$ . Chemical shifts are against internal TMS.

| Sample                                                | $\delta_{\text{N}^+\text{-H}}$ , ppm | $\delta_{\text{H7}}$ , ppm | $\delta_{\text{H6}}$ , ppm | $\delta_{\text{H5}}$ , ppm | $\delta_{\text{H3}}$ , ppm |
|-------------------------------------------------------|--------------------------------------|----------------------------|----------------------------|----------------------------|----------------------------|
| 2 mmol <b>H<sub>3</sub>L</b>                          | 10.68                                | 7.55                       | 7.31                       | 7.15                       | 6.94                       |
| 2 mmol <b>H<sub>3</sub>L</b> : 0.5 mmol $\text{K}^+$  | 10.71                                | 7.55                       | 7.31                       | 7.15                       | 6.96                       |
| 2 mmol <b>H<sub>3</sub>L</b> : 0.75 mmol $\text{K}^+$ | 10.75                                | 7.55                       | 7.31                       | 7.15                       | 6.97                       |
| 2 mmol <b>H<sub>3</sub>L</b> : 1 mmol $\text{K}^+$    | 10.77                                | 7.55                       | 7.31                       | 7.15                       | 6.97                       |
| 2 mmol <b>H<sub>3</sub>L</b> : 1.5 mmol $\text{K}^+$  | 10.77                                | 7.55                       | 7.31                       | 7.15                       | 6.97                       |
| 2 mmol <b>H<sub>3</sub>L</b> : 2 mmol $\text{K}^+$    | 10.77                                | 7.55                       | 7.31                       | 7.15                       | 6.97                       |

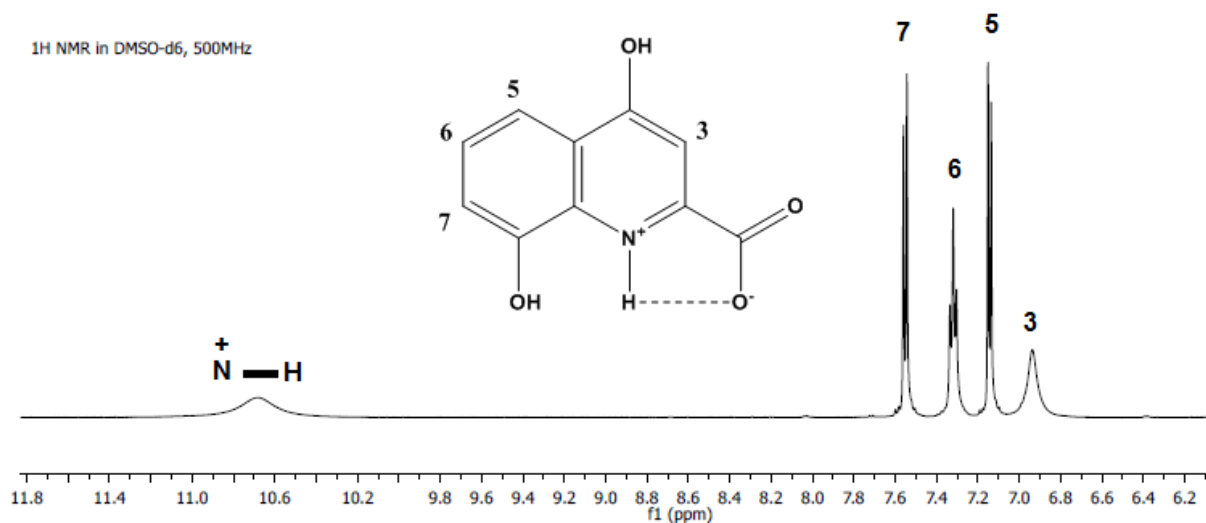

$^1\text{H}$  NMR spectrum and assignments of different protons of **H<sub>3</sub>L** in  $\text{DMSO-}d_6$ .
